# Supplementary material
Source: PubMed Central journal article supplement (PMC5606632)
Supplement: toxics-04-00007-s001.pdf [file toxics-04-00007-s001.pdf]

## Supplementary Materials: Urinary Phthalate Metabolites and Biomarkers of Oxidative Stress in a Mexican-American Cohort: Variability in Early and Late Pregnancy

Nina Holland \*, Karen Huen, Vy Tran, Kelly Street, Brian Nguyen, Asa Bradman and Brenda Eskenazi

**Table S1.** Mean phthalate metabolite concentrations ( $\mu\text{g/L}$ ) during early pregnancy by maternal demographic variables.

| Characteristic          | Frequency | MBzP  | $\Sigma\text{HMW}$ |
|-------------------------|-----------|-------|--------------------|
| Country of birth        |           |       |                    |
| US                      | 57        | 17.23 | 88.75              |
| Mexico                  | 363       | 9.64  | 110.13             |
| Other                   | 8         | 67.06 | 232.18             |
| Years in US             |           |       |                    |
| $\leq 1$                | 105       | 9.71  | 118.00             |
| 2–5                     | 110       | 8.65  | 93.91              |
| 6–10                    | 98        | 10.23 | 116.67             |
| 11+                     | 66        | 16.63 | 122.33             |
| Entire life             | 49        | 19.32 | 95.22              |
| Language spoken at home |           |       |                    |
| Spanish                 | 379       | 9.89  | 109.23             |
| Both                    | 20        | 10.74 | 70.61              |
| English                 | 24        | 41.94 | 142.51             |
| Other                   | 5         | 9.86  | 132.58             |
| Race                    |           |       |                    |
| White                   | 7         | 13.11 | 73.99              |
| Latino                  | 415       | 10.40 | 107.77             |
| Other                   | 6         | 30.16 | 275.23             |

**Table S2.** Mean phthalate metabolite and isoprostane concentrations ( $\mu\text{g/L}$ ) during late pregnancy by maternal demographic variables.

| Characteristic              | Frequency * | $\Sigma\text{LMW}$ | $\Sigma\text{HMW}$ | $\Sigma\text{DEHP}$ | Frequency ** | Isoprostanes |
|-----------------------------|-------------|--------------------|--------------------|---------------------|--------------|--------------|
| Parity                      |             |                    |                    |                     |              |              |
| 0                           | 136         | 518.76             | 88.83              | 69.53               | 52           | 5.20         |
| $\geq 1$                    | 273         | 427.08             | 129.47             | 104.11              | 125          | 5.01         |
| Pre-pregnancy Weight Status |             |                    |                    |                     |              |              |
| Normal                      | 3           | 211.44             | 72.28              | 60.40               | 1            | 1.17         |
| Underweight                 | 148         | 377.95             | 112.95             | 91.80               | 54           | 4.92         |
| Overweight                  | 152         | 502.07             | 105.95             | 82.30               | 75           | 5.68         |
| Obese                       | 97          | 531.17             | 140.19             | 113.76              | 47           | 4.35         |
| Years in US                 |             |                    |                    |                     |              |              |
| $\leq 1$                    | 103         | 550.67             | 100.32             | 79.33               | 40           | 6.08         |
| 2–5                         | 104         | 420.44             | 98.18              | 77.97               | 43           | 4.20         |
| 6–10                        | 94          | 524.29             | 116.07             | 95.11               | 56           | 5.58         |
| 11+                         | 64          | 390.57             | 171.39             | 143.88              | 25           | 3.73         |
| Entire life                 | 44          | 282.27             | 113.69             | 78.35               | 13           | 5.20         |

\* Frequency for women with phthalate metabolite measurements; \*\* Frequency for women with isoprostane measurements.
